# Supplementary material for: Association of visceral adiposity index with incident nephropathy and retinopathy: a cohort study in the diabetic population
Source: PubMed Central journal article supplement (PMC8876445; doi:10.1186/s12933-022-01464-1), 2022-02-24

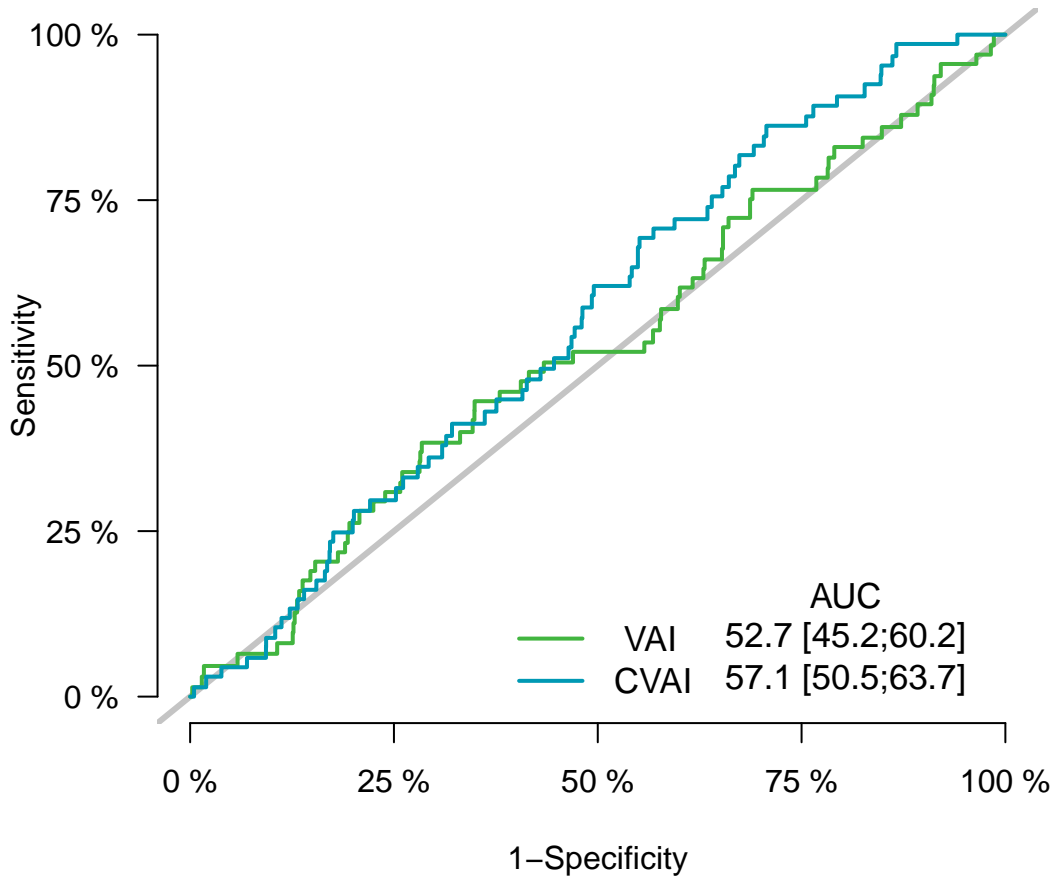

Supplement: 12933_2022_1464_MOESM2_ESM.pdf [file 12933_2022_1464_MOESM2_ESM.pdf]
